# Supplementary material
Source: Springer Nature journal article supplement (https://www.springermedizin.de/resource/supplementary/12985_2007_263_MOESM2_ESM.pdf/9607670)

(a) M13 bacteriophage sample  
with nominally prepared  $1 \times 10^3$  pfu  
Without laser irradiation

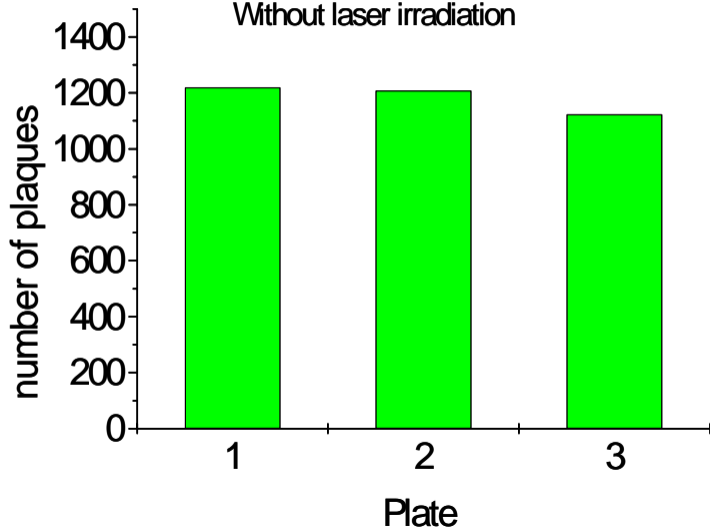

(b) M13 bacteriophage sample  
with nominally prepared  $1 \times 10^3$  pfu  
After laser irradiation

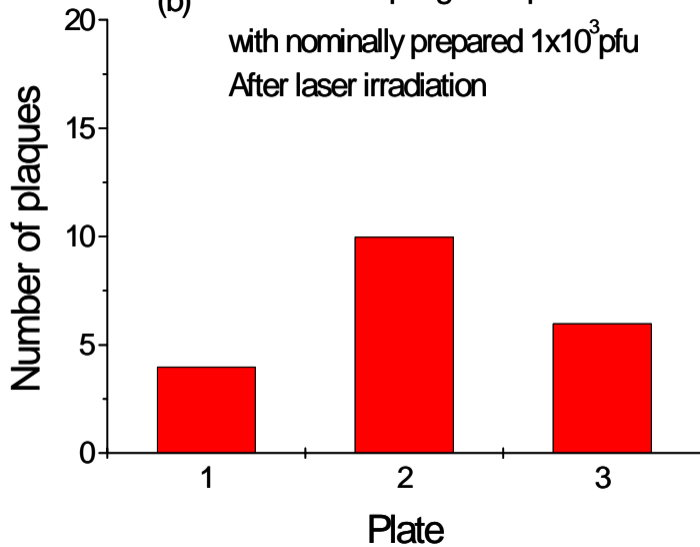

Supplement: MOESM2 [file 9607670]
